# Supplementary material for: Enhanced emission of intermediate/semi-volatile organic matters in both gas and particle phases from ship exhausts with low-sulfur fuels
Source: Copernicus journal article supplement (doi:10.5194/egusphere-2024-3433), 2024-11-14
Supplement: Supplementary file 1 [file egusphere-2024-3433-supplement.pdf]

**Enhanced emission of intermediate/semi-volatile organic matters in both gas  
and particle phases from ship exhausts with low-sulfur fuels**

Binyu Xiao, Fan Zhang\*, Zeyu Liu, Yan Zhang, Rui Li, Can Wu, Xinyi Wan, Yi  
Wang, Yubao Chen, Yong Han, Min Cui, Libo Zhang, Yingjun Chen, Gehui Wang\*

Table S1 Detailed parameters of the test three ocean-going vessels (OGVs) and four inland cargo ships (ICSs)

| Ship ID | Type               | Tonnage (kt) | Main engine                  | Auxiliary engine           | Ship age (year) |
|---------|--------------------|--------------|------------------------------|----------------------------|-----------------|
| OGV1    | Ocean going vessel | 180.0        | 2-stroke, 15748 kW, 75 rpm   | 4-stroke, 1280 kW, 900 rpm | 0               |
| OGV2    | Ocean going vessel | 110.0        | 2-stroke, 13500 kW, 91.1 rpm | 4-stroke, 900 kW, 900 rpm  | 0               |
| OGV3    | Ocean going vessel | 210.0        | 2-stroke, 15745 kW, 75rpm    | 4-stroke, 1180 kW, 900 rpm | 0               |
| ICS1    | Inland cargo ship  | 0.90         | 4-stroke, 255 kW, 1000 rpm   | -                          | 14              |
| ICS2    | Inland cargo ship  | 0.98         | 4-stroke, 300 kW, 1000 rpm   | -                          | 12              |
| ICS3    | Inland cargo ship  | 0.80         | 4-stroke, 145 kW, 1000 rpm   | -                          | 6               |
| ICS4    | Inland cargo ship  | 0.39         | 4-stroke, 138 kW, 1500 rpm   | -                          | 10              |

Table S2 Parameters of the fuels used in the test ships.

|                              | Unit                | OGV1 /HFO | OGV1 /MGO | OGV2 /HFO | OGV2 /MGO | OGV3 /HFO | OGV3 /MGO | ICS /0# diesel |
|------------------------------|---------------------|-----------|-----------|-----------|-----------|-----------|-----------|----------------|
| Gross calorific value        | MJ kg <sup>-1</sup> | 44.21     | 45.76     | 42.62     | 45.72     | 43.08     | 45.64     |                |
| Net calorific value          | MJ kg <sup>-1</sup> | 41.45     | 42.75     | 40.28     | 42.71     | 40.61     | 42.66     |                |
| Kinematic viscosity (50°C),  | mm <sup>2</sup> /s  | 44.04     |           |           |           |           |           |                |
| Kinematic viscosity (20°C),  | mm <sup>2</sup> /s  |           | 5.216     | 152.3     | 4.724     | 161.1     | 5.363     |                |
| Moisture                     | %m                  | 0.03      | N.D.      | 0.09      | N.D.      | 0.12      | N.D.      |                |
| Ash                          | %m                  |           |           |           |           |           |           |                |
| Sulfur (S)                   | %m                  | 0.50      | 0.03      | 0.43      | 0.02      | 0.43      | 0.05      | N.D.           |
| Carbon (C)                   | %m                  | 86.62     | 80.80     | 82.4      | 79.6      | 69.9      | 66.5      | 85.5           |
| Hydrogen (H)                 | %m                  | 11.33     | 8.15      | 9.68      | 12.3      | 11.3      | 10.61     |                |
| Nitrogen (N)                 | %m                  | N.D.      | N.D.      | 0.39      | N.D.      | 2.36      | N.D.      |                |
| Oxygen (O)                   | %m                  | 0.36      | N.D.      | 1.53      | 0.59      | 1.34      | 0.73      |                |
| Vanadium (V)                 | mg kg <sup>-1</sup> |           |           | N.D.      | 0.20      | 4.00      | N.D.      |                |
| Nickel (Ni)                  | mg kg <sup>-1</sup> |           |           | 16.0      | 0.10      | 15.0      | N.D.      |                |
| Sodium (Na)                  | mg kg <sup>-1</sup> |           |           | 6.00      | 0.10      | 8.00      | 0.10      |                |
| Lead (Pb)                    | mg kg <sup>-1</sup> |           |           | N.D.      | 0.30      | N.D.      | N.D.      |                |
| Zinc (Zn)                    | mg kg <sup>-1</sup> |           |           | 2.00      | 0.40      | 8.00      | 0.20      |                |
| Aluminum + Silicon (Al + Si) | mg kg <sup>-1</sup> |           |           | 8.00      | 0.80      | 12.0      | 0.90      |                |

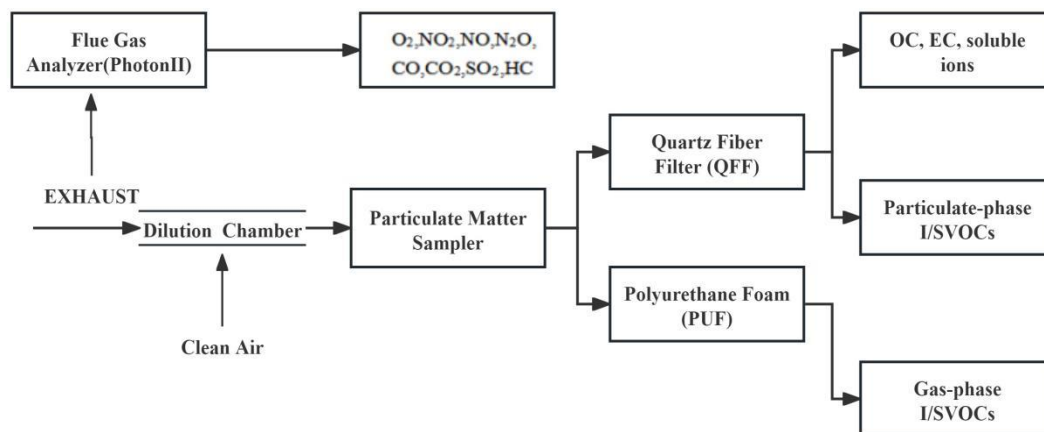

Figure S1 Schematic diagram of on-board measurement system

Table S3 The identified I/SVOC species in this study

| Compounds               | Abbreviation    | M/Z | Detection limit (ng/m <sup>3</sup> ) | Recovery (%) | classification |
|-------------------------|-----------------|-----|--------------------------------------|--------------|----------------|
| (I) n-Alkanes           |                 |     |                                      |              |                |
| Dodecane                | C <sub>12</sub> | 170 | 0.11                                 | 86           | IVOC           |
| Tridecane               | C <sub>13</sub> | 184 | 0.12                                 | 84           | IVOC           |
| Tetradecane             | C <sub>14</sub> | 198 | 0.12                                 | 91           | IVOC           |
| Pentadecane             | C <sub>15</sub> | 212 | 0.12                                 | 90           | IVOC           |
| Hexadecane              | C <sub>16</sub> | 226 | 0.12                                 | 83           | IVOC           |
| Heptadecane             | C <sub>17</sub> | 240 | 0.12                                 | 81           | IVOC           |
| Octadecane              | C <sub>18</sub> | 254 | 0.26                                 | 83           | IVOC           |
| Nonadecane              | C <sub>19</sub> | 268 | 0.25                                 | 85           | IVOC           |
| Icosane                 | C <sub>20</sub> | 282 | 0.26                                 | 82           | IVOC           |
| Henicosane              | C <sub>21</sub> | 296 | 0.20                                 | 89           | IVOC           |
| Docosane                | C <sub>22</sub> | 310 | 0.15                                 | 92           | IVOC           |
| Tricosane               | C <sub>23</sub> | 324 | 0.56                                 | 93           | SVOC           |
| Tetracosane             | C <sub>24</sub> | 338 | 0.29                                 | 95           | SVOC           |
| Pentacosane             | C <sub>25</sub> | 352 | 0.11                                 | 80           | SVOC           |
| Hexacosane              | C <sub>26</sub> | 366 | 0.45                                 | 88           | SVOC           |
| Heptacosane             | C <sub>27</sub> | 380 | 0.24                                 | 96           | SVOC           |
| Octacosane              | C <sub>28</sub> | 394 | 0.61                                 | 98           | SVOC           |
| Nonacosane              | C <sub>29</sub> | 408 | 0.65                                 | 84           | SVOC           |
| Triacontane             | C <sub>30</sub> | 422 | 0.56                                 | 96           | SVOC           |
| Hentriacontane          | C <sub>31</sub> | 436 | 0.76                                 | 92           | SVOC           |
| Dotriacontane           | C <sub>32</sub> | 450 | 0.37                                 | 90           | SVOC           |
| Tritriacontane          | C <sub>33</sub> | 464 | 0.11                                 | 84           | SVOC           |
| Tetratriacontane        | C <sub>34</sub> | 478 | 0.20                                 | 86           | SVOC           |
| Pentatriacontane        | C <sub>35</sub> | 492 | 0.21                                 | 93           | SVOC           |
| Hexatriacontane         | C <sub>36</sub> | 506 | 0.12                                 | 92           | SVOC           |
| (II)PAHs                |                 |     |                                      |              |                |
| Phenanthrene            | Phe             | 178 | 0.11                                 | 79           | IVOC           |
| Anthracene              | Ant             | 178 | 0.02                                 | 80           | IVOC           |
| Fluoranthene            | Flu             | 202 | 0.13                                 | 86           | IVOC           |
| Pyrene                  | Pyr             | 202 | 0.10                                 | 84           | IVOC           |
| Benz(a)anthracene       | BaA             | 228 | 0.04                                 | 83           | IVOC           |
| Chrysene / Triphenylene | Chr/TP          | 228 | 0.25                                 | 85           | IVOC           |
| Benzo(b)fluoranthene    | BbF             | 252 | 0.34                                 | 89           | IVOC           |
| Benzo(k)fluoranthene    | BkF             | 252 | 0.11                                 | 93           | IVOC           |
| Benzo(a)pyrene          | BaP             | 252 | 0.28                                 | 92           | IVOC           |
| Benzo(e)pyrene          | BeP             | 252 | 0.09                                 | 95           | IVOC           |
| Perylene                | Pery            | 252 | 0.02                                 | 83           | IVOC           |
| Indeno[123-cd]pyrene    | IP              | 276 | 0.14                                 | 86           | SVOC           |
| Dibenz(a,h)anthracene   | DBA             | 278 | 0.02                                 | 88           | SVOC           |
| Benzo(ghi)perylene      | BghiP           | 276 | 0.10                                 | 89           | SVOC           |
| (III) OPAHs             |                 |     |                                      |              |                |
| 1-Naphthaldehyd         | 1-Nap           | 156 | 0.01                                 | 80           | IVOC           |
| 9-Fluorenone            | 9-FO            | 180 | 0.01                                 | 97           | IVOC           |
| Anthraquinone           | ATQ             | 208 | 0.01                                 | 98           | IVOC           |
| Benzanthrone            | BZA             | 230 | 0.01                                 | 93           | IVOC           |

|                                                  |                     |     |      |    |      |
|--------------------------------------------------|---------------------|-----|------|----|------|
| Benzo(a)anthracene-7,12-dione                    | 7,12-BaAQ           | 304 | 0.02 | 91 | IVOC |
| 1,4-Chrysenequinone                              | 1,4-CQ              | 258 | 0.01 | 99 | SVOC |
| 5,12-Naphthacenequinone                          | 5,12-NAQ            | 318 | 0.04 | 93 | SVOC |
| 6H-Benzo(cd)pyrene-6-one                         | BPYRone             | 254 | 0.01 | 97 | SVOC |
| <hr/>                                            |                     |     |      |    |      |
| (IV) Fatty acids                                 |                     |     |      |    |      |
| Capric Acid                                      | C <sub>10:0</sub>   | 172 | 0.32 | 93 | IVOC |
| Undecanoic Acid                                  | C <sub>11:0</sub>   | 186 | 0.48 | 94 | IVOC |
| Dodecanoic                                       | C <sub>12:0</sub>   | 200 | 0.75 | 93 | IVOC |
| Tridecanoic                                      | C <sub>13:0</sub>   | 214 | 0.58 | 91 | IVOC |
| Tetradecanoic                                    | C <sub>14:0</sub>   | 228 | 0.17 | 91 | IVOC |
| Pentadecanoic                                    | C <sub>15:0</sub>   | 242 | 4.20 | 88 | IVOC |
| Hexadecanoic                                     | C <sub>16:0</sub>   | 256 | 0.30 | 84 | IVOC |
| Heptadecanoic                                    | C <sub>17:0</sub>   | 270 | 0.16 | 86 | IVOC |
| Octadecanoic                                     | C <sub>18:0</sub>   | 284 | 0.56 | 91 | IVOC |
| Octadecenoic                                     | C <sub>18:1</sub>   | 282 | 0.22 | 91 | IVOC |
| Nonadecanoic                                     | C <sub>19:0</sub>   | 298 | 0.31 | 95 | IVOC |
| Eicosanoic                                       | C <sub>20:0</sub>   | 312 | 0.95 | 92 | IVOC |
| Heneicosanoic                                    | C <sub>21:0</sub>   | 326 | 0.95 | 93 | IVOC |
| Docosanoic                                       | C <sub>22:0</sub>   | 340 | 0.93 | 88 | IVOC |
| <hr/>                                            |                     |     |      |    |      |
| (V) Aromatic acids                               |                     |     |      |    |      |
| o-Phthalic acid                                  | O-Ph                | 166 | 0.11 | 95 | IVOC |
| m-Phthalic acid                                  | M-Ph                | 166 | 0.05 | 92 | IVOC |
| p-Phthalic acid                                  | P-Ph                | 166 | 0.11 | 96 | IVOC |
| <hr/>                                            |                     |     |      |    |      |
| (VI) Hopanes                                     |                     |     |      |    |      |
| 17 $\alpha$ (H)-22,29,30-trisnorhopane           | C <sub>27a</sub>    | 191 | 0.08 | 86 | SVOC |
| 17 $\beta$ (H)-22,29,30-trisnorhopane            | C <sub>27b</sub>    | 191 | 0.03 | 86 | SVOC |
| 17 $\alpha$ (H),21 $\beta$ (H)-30-norhopane      | C <sub>29ab</sub>   | 191 | 0.26 | 93 | SVOC |
| 17 $\beta$ (H),21 $\alpha$ (H)-30-norhopane      | C <sub>29ba</sub>   | 191 | 0.04 | 89 | SVOC |
| 17 $\alpha$ (H),21 $\beta$ (H)-hopane            | C <sub>30ab</sub>   | 191 | 0.19 | 94 | SVOC |
| 17 $\beta$ (H),21 $\alpha$ (H)-hopane            | C <sub>30ba</sub>   | 191 | 0.01 | 86 | SVOC |
| 17 $\alpha$ (H),21 $\beta$ (H)-22S-homohopane    | C <sub>31ab S</sub> | 191 | 0.01 | 88 | SVOC |
| 17 $\alpha$ (H),21 $\beta$ (H)-22R-homohopane    | C <sub>31ba S</sub> | 191 | 0.01 | 84 | SVOC |
| 17 $\beta$ (H),21 $\alpha$ (H)-homohopane        | C <sub>31ba</sub>   | 191 | 0.01 | 82 | SVOC |
| 17 $\alpha$ (H),21 $\beta$ (H)-22S-bishomohopane | C <sub>32ab S</sub> | 191 | 0.01 | 86 | SVOC |
| 17 $\alpha$ (H),21 $\beta$ (H)-22R-bishomohopane | C <sub>32ab R</sub> | 191 | 0.01 | 82 | SVOC |

M/Z: Mass-to-charge ratio

Table S4 SOA yields used in this study

| Carbon Number | N-alkanes | B-alkanes | PAHs | UCM   | Data sources                                                                      |
|---------------|-----------|-----------|------|-------|-----------------------------------------------------------------------------------|
| 12            | 0.01      | 0.0017    | 0.28 | 0.01  |                                                                                   |
| 13            | 0.019     | 0.0035    | 0.40 | 0.019 |                                                                                   |
| 14            | 0.033     | 0.007     | 0.49 | 0.033 |                                                                                   |
| 15            | 0.055     | 0.013     | 0.62 | 0.055 |                                                                                   |
| 16            | 0.089     | 0.024     | 0.70 | 0.089 |                                                                                   |
| 17            | 0.14      | 0.042     | 0.75 | 0.14  |                                                                                   |
| 18            | 0.23      | 0.073     | 0.79 | 0.23  |                                                                                   |
| 19            | 0.37      | 0.12      | 0.82 | 0.37  |                                                                                   |
| 20            | 0.56      | 0.20      | 0.82 | 0.56  |                                                                                   |
| 21            | 0.77      | 0.32      | 0.82 | 0.77  |                                                                                   |
| 22            | 0.96      | 0.47      | 0.82 | 0.96  | N-alkanes and B-alkanes from Gentner et al. (2012); PAHs from Zhao et al. (2014). |
| 23            | 1.08      | 0.61      | 0.82 | 1.08  |                                                                                   |
| 24            | 1.14      | 0.70      | 0.82 | 1.14  |                                                                                   |
| 25            | 1.16      | 0.75      | 0.82 | 1.16  |                                                                                   |
| 26            | 1.16      | 0.75      | 0.82 | 1.16  |                                                                                   |
| 27            | 1.16      | 0.75      | 0.82 | 1.16  |                                                                                   |
| 28            | 1.16      | 0.75      | 0.82 | 1.16  |                                                                                   |
| 29            | 1.16      | 0.75      | 0.82 | 1.16  |                                                                                   |
| 30            | 1.16      | 0.75      | 0.82 | 1.16  |                                                                                   |
| 31            | 1.16      | 0.75      | 0.82 | 1.16  |                                                                                   |
| 32            | 1.16      | 0.75      | 0.82 | 1.16  |                                                                                   |
| 33            | 1.16      | 0.75      | 0.82 | 1.16  |                                                                                   |
| 34            | 1.16      | 0.75      | 0.82 | 1.16  |                                                                                   |
| 35            | 1.16      | 0.75      | 0.82 | 1.16  |                                                                                   |
| 36            | 1.16      | 0.75      | 0.82 | 1.16  |                                                                                   |

Note: The yield of SOA<sub>n-alkane</sub> after carbon number 25 was estimated by pentacosane, while yield of SOA<sub>b-alkane</sub> after carbon number 25 was also estimated by 25th b-alkane, yield of SOA<sub>UCM</sub> was replaced with data from n-alkane, and other substances were replaced with corresponding data from n-alkanes based on their volatility distribution.(Gentner et al., 2012; Zhao et al., 2014)

Table S5 Reaction constant of OH radicals used in this study

| Carbon Number | N-alkanes | B-alkanes | PAHs     | UCM      | Data sources          |
|---------------|-----------|-----------|----------|----------|-----------------------|
| 12            | 1.32E-11  | 1.32E-11  | 2.30E-11 | 1.32E-11 |                       |
| 13            | 1.51E-11  | 1.51E-11  | 4.86E-11 | 1.51E-11 |                       |
| 14            | 1.68E-11  | 1.68E-11  | 6.00E-11 | 1.68E-11 |                       |
| 15            | 1.82E-11  | 1.82E-11  | 8.00E-11 | 1.82E-11 |                       |
| 16            | 1.96E-11  | 1.96E-11  | 8.00E-11 | 1.96E-11 |                       |
| 17            | 2.10E-11  | 2.10E-11  | 2.10E-11 | 2.10E-11 | Zhao et al.<br>(2014) |
| 18            | 2.24E-11  | 2.24E-11  | 2.24E-11 | 2.24E-11 |                       |
| 19            | 2.38E-11  | 2.38E-11  | 2.38E-11 | 2.38E-11 |                       |
| 20            | 2.52E-11  | 2.52E-11  | 2.52E-11 | 2.52E-11 |                       |
| 21            | 2.67E-11  | 2.67E-11  | 2.67E-11 | 2.67E-11 |                       |
| 22            | 2.81E-11  | 2.81E-11  | 2.81E-11 | 2.81E-11 |                       |

Table S6 Profiles of I/SVOCs in ship exhausts under different fuels(%)

| Compounds         | HFO       | MGO       | 0# diesel |
|-------------------|-----------|-----------|-----------|
| (I) Acids         |           |           |           |
| O-Ph              | 0.54±0.13 | 0.89±0.67 | 0.55±0.99 |
| M-Ph              | 0.12±0.01 | 0.19±0.12 | 0.18±0.40 |
| P-Ph              | 0.58±0.24 | 1.02±0.85 | 0.34±0.48 |
| C <sub>10:0</sub> | 0.40±0.15 | 0.61±0.38 | 0.95±1.54 |
| C <sub>11:0</sub> | 2.07±0.11 | 3.05±0.25 | 3.09±0.97 |
| C <sub>12:0</sub> | 0.71±0.13 | 5.89±0.46 | 4.50±2.60 |
| C <sub>13:0</sub> | 0.25±0.12 | 0.43±0.10 | 0.66±0.47 |
| C <sub>14:0</sub> | 1.31±0.03 | 10.1±0.36 | 5.31±1.52 |
| C <sub>15:0</sub> | 0.86±0.06 | 3.60±0.20 | 2.17±1.02 |
| C <sub>16:0</sub> | 0.39±0.02 | 0.67±1.58 | 0.52±4.79 |
| C <sub>17:0</sub> | 0.30±0.10 | 0.91±0.05 | 0.99±0.38 |
| C <sub>18:0</sub> | 4.39±0.04 | 2.39±1.09 | 5.16±4.92 |
| C <sub>18:1</sub> | 4.84±0.03 | 3.39±0.43 | 0.54±2.20 |
| C <sub>19:0</sub> | 0.28±0.02 | 0.70±0.04 | 0.61±0.18 |
| C <sub>20:0</sub> | 0.41±0.05 | 1.92±0.13 | 0.80±0.24 |
| C <sub>21:0</sub> | 0.14±0.17 | 0.67±0.02 | 0.70±0.11 |
| C <sub>22:0</sub> | 0.34±0.17 | 2.09±0.03 | 0.74±0.28 |
| (II) n-Alkanes    |           |           |           |
| C <sub>12</sub>   | 0.12±0.07 | 0.16±0.03 | 0.12±0.12 |
| C <sub>14</sub>   | 0.14±0.06 | 0.28±0.06 | 0.52±0.69 |
| C <sub>15</sub>   | 0.38±0.37 | 0.63±0.14 | 1.18±2.46 |
| C <sub>16</sub>   | 0.88±1.35 | 0.72±0.15 | 2.38±5.48 |
| C <sub>17</sub>   | 2.41±3.62 | 3.04±2.24 | 4.56±8.84 |
| C <sub>18</sub>   | 3.45±4.36 | 3.04±3.55 | 3.00±7.08 |
| C <sub>19</sub>   | 4.95±0.42 | 3.31±2.83 | 3.34±7.61 |
| C <sub>20</sub>   | 4.83±0.09 | 2.28±1.98 | 2.43±6.08 |
| C <sub>21</sub>   | 4.21±2.22 | 2.20±1.51 | 2.13±5.05 |
| C <sub>22</sub>   | 3.48±0.17 | 1.94±1.55 | 1.54±3.62 |
| C <sub>23</sub>   | 3.06±1.67 | 1.61±1.51 | 1.21±2.88 |
| C <sub>24</sub>   | 2.85±0.16 | 1.74±1.35 | 0.98±2.19 |

|                     |           |           |           |
|---------------------|-----------|-----------|-----------|
| C <sub>25</sub>     | 2.87±4.80 | 1.46±0.86 | 2.94±5.83 |
| C <sub>26</sub>     | 2.43±0.38 | 1.02±0.60 | 1.55±3.66 |
| C <sub>27</sub>     | 2.20±0.11 | 0.92±0.52 | 2.23±5.31 |
| C <sub>28</sub>     | 1.79±0.48 | 0.70±0.32 | 1.50±3.48 |
| C <sub>29</sub>     | 1.57±0.08 | 0.61±0.26 | 0.83±1.37 |
| C <sub>30</sub>     | 1.14±2.11 | 0.36±0.16 | 0.65±1.26 |
| C <sub>31</sub>     | 1.02±1.90 | 0.29±0.17 | 0.46±0.79 |
| C <sub>32</sub>     | 0.70±1.43 | 0.19±0.12 | 0.47±1.06 |
| C <sub>33</sub>     | 0.54±1.15 | 0.17±0.11 | 0.49±1.35 |
| C <sub>34</sub>     | 0.35±0.76 | 0.18±0.08 | 0.33±0.89 |
| C <sub>35</sub>     | 0.30±0.37 | 0.11±0.02 | 0.21±0.05 |
| C <sub>36</sub>     | 0.10±0.02 | 0.11±0.01 | 0.15±0.04 |
| <hr/>               |           |           |           |
| (III) PAHs          |           |           |           |
| Phe                 | 0.81±0.13 | 0.72±0.10 | 0.77±0.23 |
| Ant                 | 0.06±0.01 | 0.04±0.01 | 0.09±0.01 |
| Flu                 | 0.29±0.24 | 0.18±0.12 | 0.22±0.28 |
| Pyr                 | 0.18±0.15 | 0.10±0.04 | 0.22±0.32 |
| BaA                 | 0.07±0.11 | 0.06±0.03 | 0.05±0.05 |
| Chr/TP              | 0.10±0.13 | 0.06±0.09 | 0.03±0.05 |
| BbF                 | 0.10±0.12 | 0.07±0.06 | 0.10±0.11 |
| BkF                 | 0.03±0.03 | 0.04±0.01 | 0.08±0.03 |
| BaP                 | 0.04±0.06 | 0.01±0.02 | 0.02±0.04 |
| BeP                 | 0.08±0.02 | 0.12±0.01 | 0.03±0.01 |
| Pery                | 0.02±0.01 | 0.04±0.01 | 0.00±0.01 |
| IP                  | 0.03±0.04 | 0.04±0.01 | 0.05±0.01 |
| DBA                 | 0.02±0.02 | 0.03±0.01 | 0.03±0.02 |
| BghiP               | 0.02±0.01 | 0.02±0.01 | 0.02±0.00 |
| <hr/>               |           |           |           |
| (IV) OPAHs          |           |           |           |
| 1-Nap               | 3.66±0.17 | 3.96±0.47 | 7.46±6.30 |
| 9-FO                | 0.17±0.17 | 0.26±0.36 | 0.17±0.23 |
| ATQ                 | 1.21±0.97 | 1.22±0.41 | 0.92±0.42 |
| BZA                 | 0.08±0.07 | 0.08±0.05 | 0.16±0.08 |
| 7,12-BaAQ           | 3.66±0.17 | 3.96±0.47 | 7.46±6.30 |
| 1,4-CQ              | 0.00±0.00 | 0.00±0.00 | 0.00±0.00 |
| 5,12-NAQ            | 0.00±0.00 | 0.00±0.00 | 0.00±0.00 |
| BPYRone             | 0.00±0.00 | 0.00±0.00 | 0.00±0.00 |
| <hr/>               |           |           |           |
| (V) Hopanes         |           |           |           |
| C <sub>27a</sub>    | 0.24±0.42 | 0.13±0.06 | 0.09±0.13 |
| C <sub>27b</sub>    | 0.05±0.09 | 0.07±0.09 | 0.02±0.01 |
| C <sub>29ab</sub>   | 1.07±2.22 | 0.49±0.54 | 0.25±0.66 |
| C <sub>29ba</sub>   | 0.09±0.17 | 0.05±0.04 | 0.03±0.08 |
| C <sub>30ab</sub>   | 0.85±1.67 | 0.37±0.37 | 0.25±0.63 |
| C <sub>30ba</sub>   | 0.10±0.16 | 0.05±0.04 | 0.05±0.12 |
| C <sub>31ab S</sub> | 0.39±0.80 | 0.17±0.18 | 0.06±0.15 |
| C <sub>31ba S</sub> | 0.21±0.38 | 0.10±0.09 | 0.09±0.23 |
| C <sub>31ba</sub>   | 0.05±0.11 | 0.04±0.05 | 0.02±0.05 |
| C <sub>32ab S</sub> | 0.24±0.48 | 0.10±0.11 | 0.06±0.14 |
| C <sub>32ab R</sub> | 0.03±0.08 | 0.04±0.05 | 0.01±0.01 |



Table S7 Abbreviations used in this article and their definitions

| Abbreviations | Full name                                                           |
|---------------|---------------------------------------------------------------------|
| IMO           | International Maritime Organization                                 |
| MARPOL        | International Convention for the Prevention of Pollution from Ships |
| SECA          | Sulfur Emission Control Area                                        |
| STEAM         | Ship Traffic Emissions Assessment Model                             |
| SOA           | secondary organic aerosol                                           |
| POA           | primary organic aerosols                                            |
| VOC           | volatile organic compounds                                          |
| IVOC          | intermediate organic compounds                                      |
| SVOC          | intermediate organic compounds                                      |
| OGV           | ocean-going vessel                                                  |
| ICS           | inland cargo ship                                                   |
| HSF           | high-sulfur fuel                                                    |
| LSF           | low-sulfur fuel                                                     |
| HFO           | heavy fuel oil                                                      |
| MGO           | marine gas oil                                                      |
| WCO           | waste cooking oil                                                   |
| ME            | main engine                                                         |
| AE            | auxiliary engine                                                    |
| LSE           | low-speed engine                                                    |
| MSE           | medium-speed engine                                                 |
| SOAFP         | secondary organic aerosol formation potential                       |
| UCM           | unresolved complex mixture                                          |
| PAH           | polycyclic aromatic hydrocarbon                                     |
| OPAH          | oxygenated polycyclic aromatic hydrocarbons                         |
| b-alkane      | branched alkanes                                                    |

### References:

- Gentner, D. R., Isaacman, G., Worton, D. R., Chan, A. W. H., Dallmann, T. R., Davis, L., Liu, S., Day, D. A., Russell, L. M., Wilson, K. R., Weber, R., Guha, A., Harley, R. A., and Goldstein, A. H.: Elucidating secondary organic aerosol from diesel and gasoline vehicles through detailed characterization of organic carbon emissions, *Proc. Natl. Acad. Sci. U. S. A.*, 109, 18318-18323, 10.1073/pnas.1212272109, 2012.
- Zhao, Y., Hennigan, C. J., May, A. A., Tkacik, D. S., de Gouw, J. A., Gilman, J. B., Kuster, W. C., Borbon, A., and Robinson, A. L.: Intermediate-Volatility Organic Compounds: A Large Source of Secondary Organic Aerosol, *Environ. Sci. Technol.*, 48, 13743-13750, 10.1021/es5035188, 2014.
